# Supplementary material for: A galvanic replacement reaction to synthesise metal/ZnO heterostructured films on zinc substrates for enhanced photocatalytic performance
Source: Royal Society of Chemistry journal article supplement (doi:10.1039/c6ra23587e), 2016-01-01
Supplement: c6ra23587e1.pdf [file c6ra23587e1.pdf]

## Electronic Supporting Information

### **A galvanic replacement reaction to synthesis of metal/ZnO heterostructured film on zinc substrate for enhanced photocatalytic performance**

Kai Wang,<sup>a,b</sup> Zhangxian Chen,<sup>a</sup> Mengqiu Huang,<sup>a</sup> Zeheng Yang,<sup>a</sup> Chunyan Zeng,<sup>a</sup> Lei Wang,<sup>a</sup>

Maoqin Qiu,<sup>a</sup> Yingmeng Zhang,<sup>a</sup> and Weixin Zhang,<sup>a\*</sup>

a. School of Chemistry and Chemical Engineering, Hefei University of Technology

Hefei, 230009, Anhui, China, E-mail: wxzhang@hfut.edu.cn

b. School of Chemistry and Chemical Engineering, Beifang University of Nationality

Yinchuan, 750021, Ningxia, China

**Figure S1**

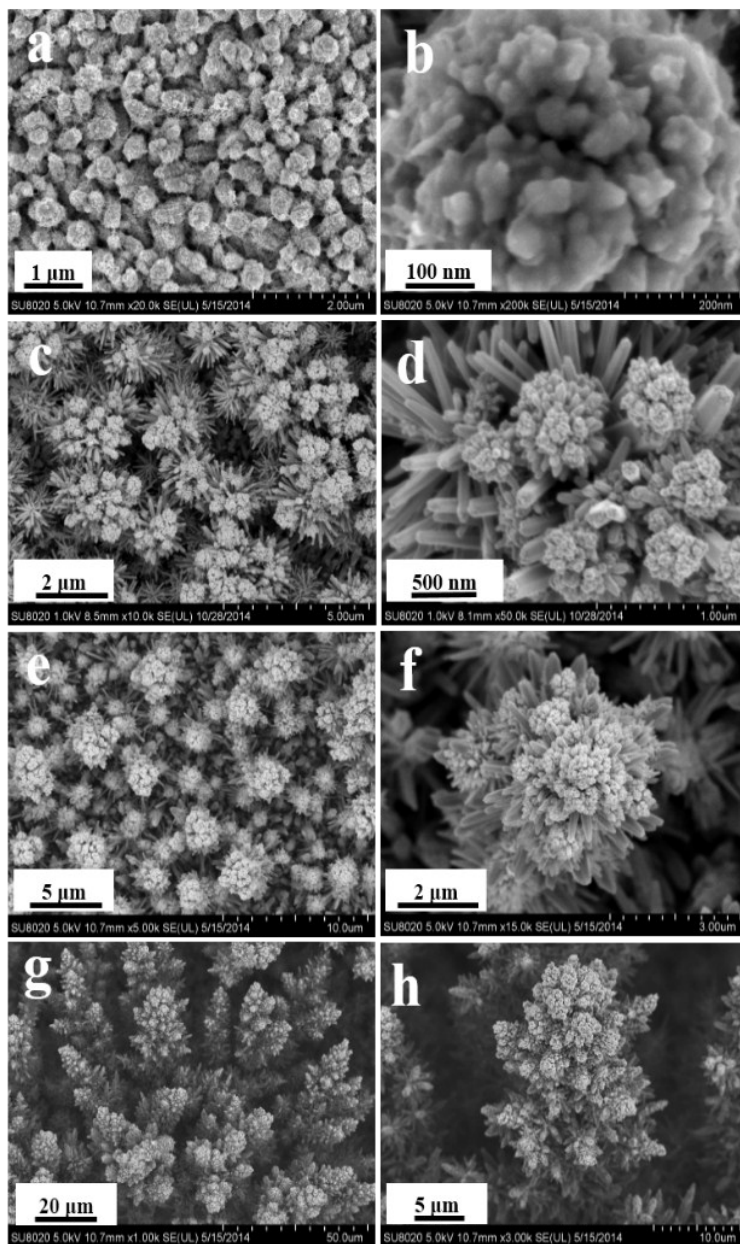

**Figure S1.** FESEM images of the as-obtained Cu/ZnO heterostructured film on zinc substrate at different reaction times: (a-b) 1 h, (c-d) 3 h, (e-f) 6 h, (g-h) 12 h.

**Figure S2**

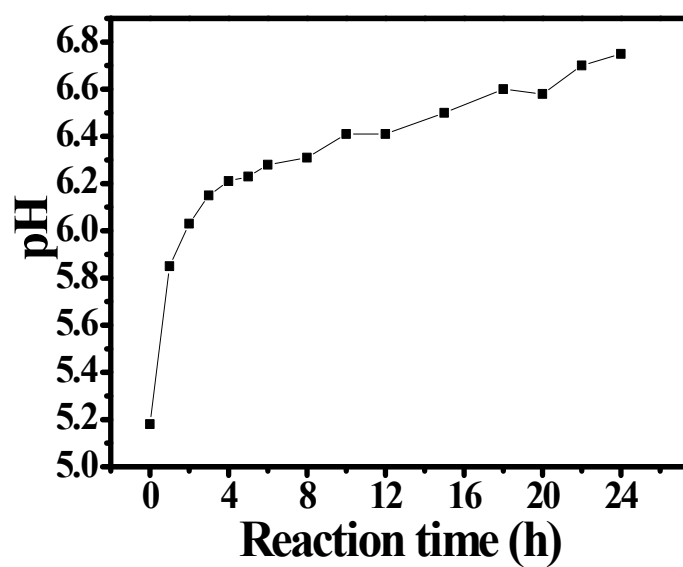

**Fig. S2** The pH values of the reaction media as a function of reaction time during the synthesis of Cu/ZnO heterostructured films ( $c_{\text{Cu}^{2+}} = 0.6 \text{ mM}$ ).

**Figure S3**

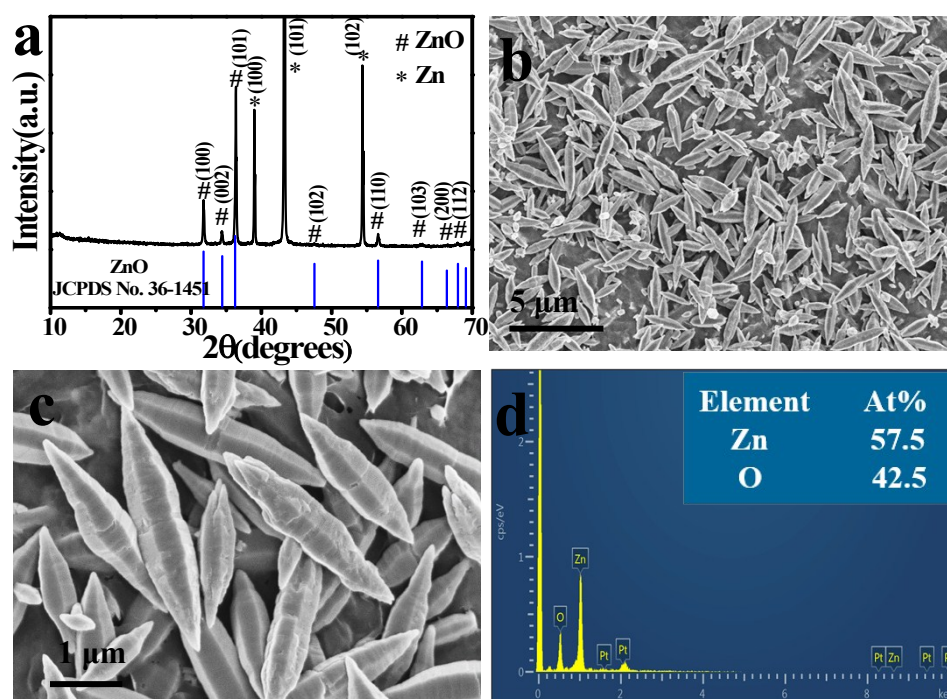

**Fig. S3** (a) XRD pattern, (b, c) FESEM images and (d) EDS spectrum of the ZnO nanospindle films grown on zinc substrate.

**Figure S4**

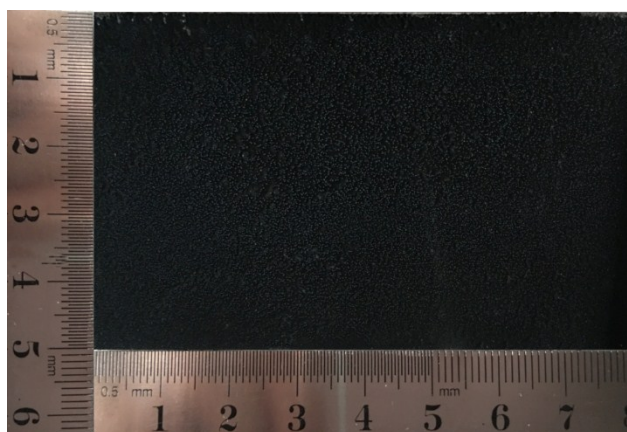

**Fig. S4** The optical image of the Cu/ZnO heterostructured film grown on large area of Zn substrate (40 cm<sup>2</sup>).

**Figure S5**

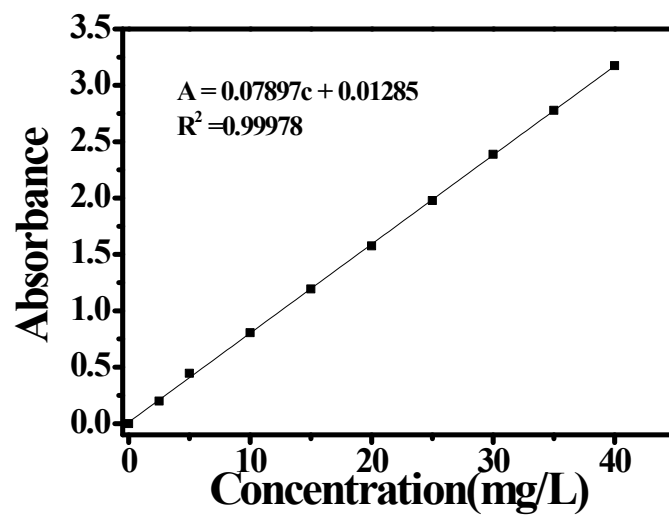

**Fig. S5** The linear calibration curve for a series of standard MO aqueous solutions (0 mg/L, 2.5 mg/L, 5 mg/L, 10 mg/L, 15 mg/L, 20 mg/L, 25 mg/L, 30 mg/L, 35 mg/L and 40 mg/L).

Figure S6

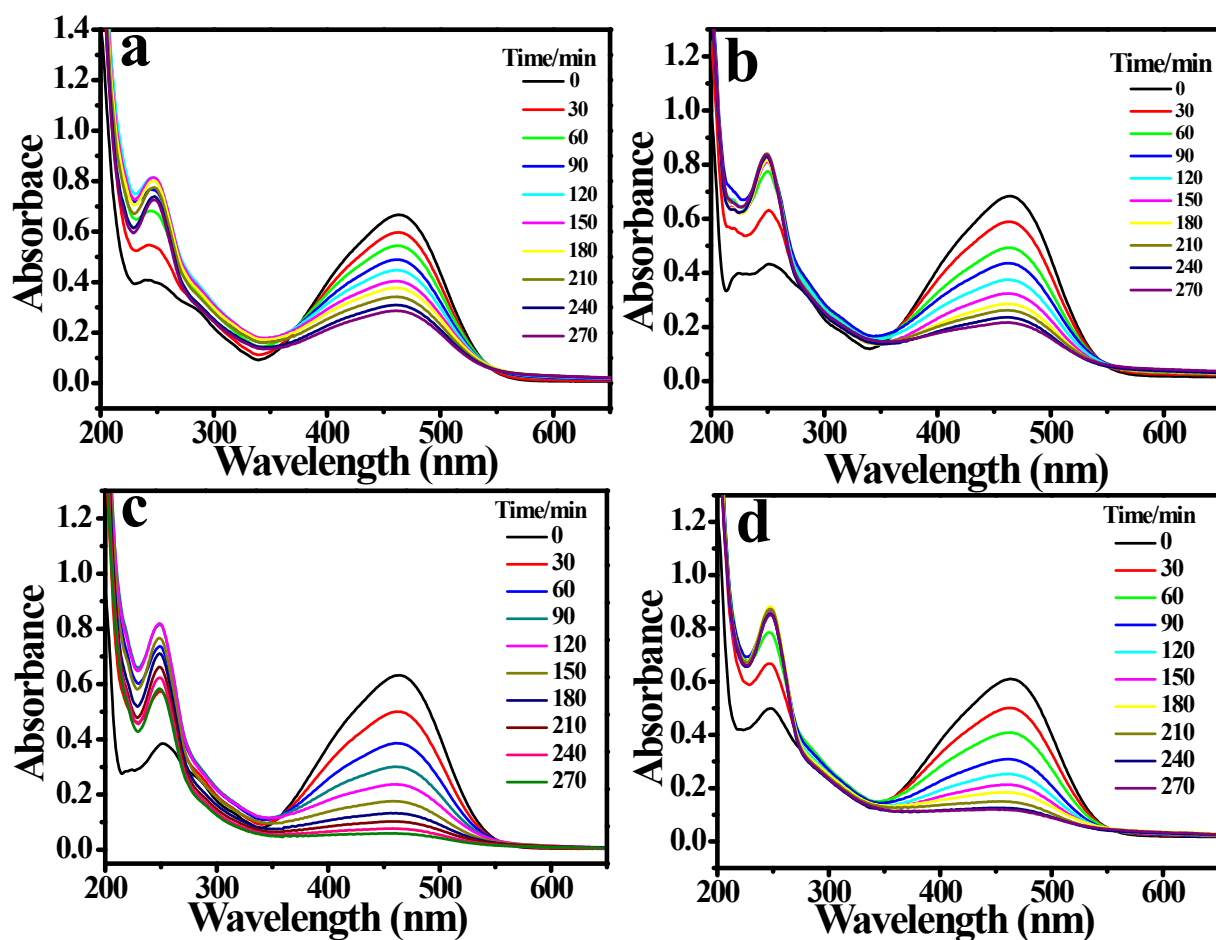

Fig. S6 Time-dependent UV-vis absorption spectra of MO aqueous solution under visible light irradiation in the presence of different photocatalysts: (a) ZnO, and Cu/ZnO heterostructures prepared with different concentrations of Cu<sup>2+</sup>: (b) 0.2 mM (S1), (c) 0.6 mM (S2) and (d) 2.0 mM (S3).

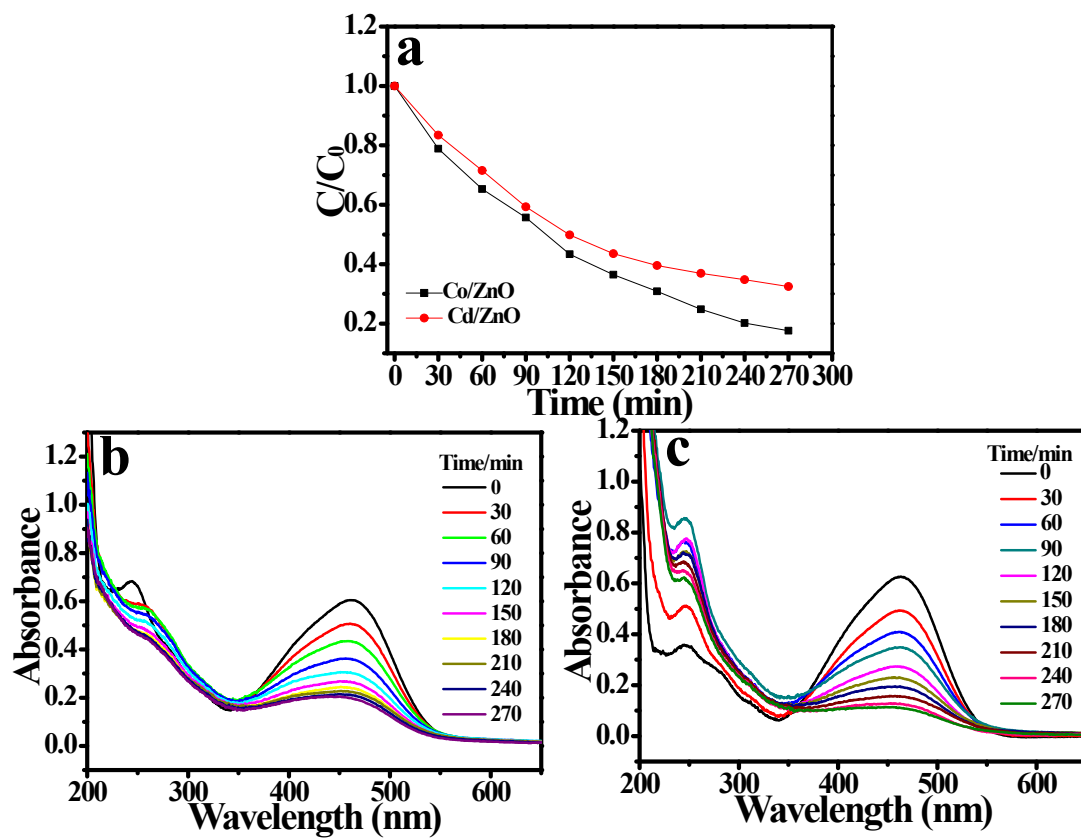

**Fig. S7** (a) Photocatalytic degradation and (b, c) time-dependent UV-vis absorption spectra of MO solution with different catalysts: (b) Cd/ZnO and (c) Co/ZnO heterostructured films.

**Figure S8**

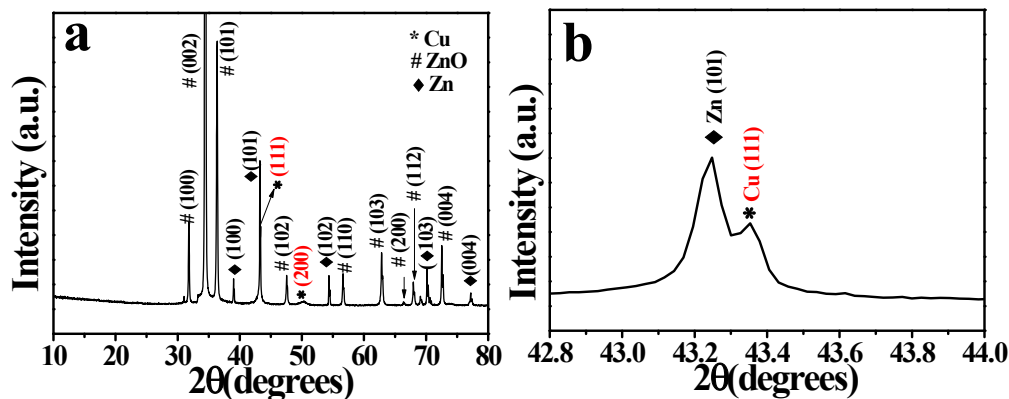

**Fig. S8** (a) The XRD pattern of pine tree-like Cu/ZnO heterostructured film on zinc substrate after the fifth catalysis cycles. (b) Fine-scanned Zn(101) and Cu(111) peaks of the Fig.S8 a.

**Fig. S8a** presents the XRD pattern of pine tree-like Cu/ZnO heterostructured film on zinc substrate after the fifth catalysis cycles. It can be indexed to the cubic Cu (JCPDS No. 04-0836) and hexagonal wurtzite ZnO (JCPDS No. 36-1451). The peaks of Zn (JCPDS No. 04-0831) come from the zinc substrate. No other noticeable peaks from Cu<sub>2</sub>O are observed, demonstrating the stability of the catalyst.

**Figure S9**

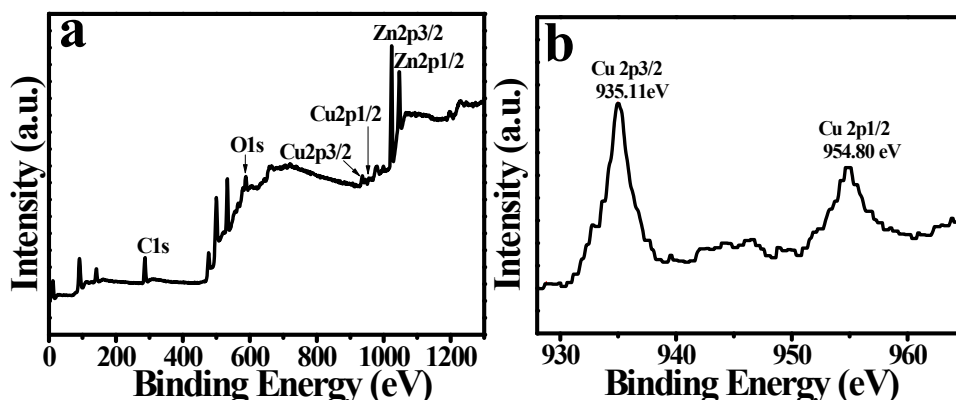

**Fig. S9** XPS spectra of the pine tree-like Cu/ZnO heterostructured film on zinc substrate after the fifth catalysis cycles: (a) survey spectrum, and core-level spectra of (b) Cu 2p

To further evaluate the stability of the catalyst, the XPS survey spectrum (Fig. S9a) of the pine tree-like Cu/ZnO heterostructured film on zinc substrate after the fifth catalysis cycles indicates that in reference to the aliphatic C 1s peak (286.94 eV), elements of Cu, Zn and O can be detected. The binding energies of Cu 2p<sub>3/2</sub> and Cu 2p<sub>1/2</sub> are located at 935.11 eV and 954.80 eV, respectively (Fig. S9b), with a spin-orbital splitting of 19.69 eV. In addition, no obvious satellite peak can be observed after five cycles, suggesting that copper exists in zero valent in the Cu/ZnO heterostructured film.<sup>15,16</sup>

## Figure S10

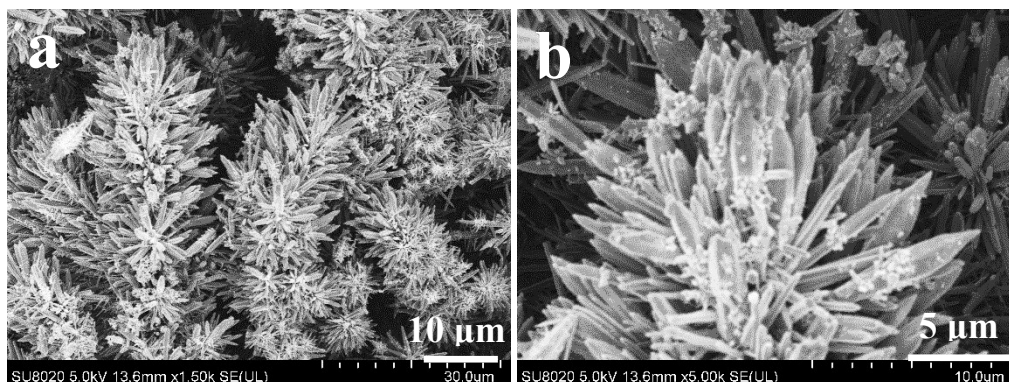

Fig. S10 (a) Low and high resolution FESEM images of pine tree-like Cu/ZnO heterostructured film on zinc substrate after the fifth catalysis cycles

Fig. S10 presents the FESEM images of pine tree-like Cu/ZnO heterostructured film on zinc substrate after the fifth catalysis cycles for the catalysis process of MO. After five cycles, the pine tree-like structure has deformed partly (Fig. S10a) but Cu nanoparticles can still be observed clearly on ZnO nanorods (Fig. S10b).

**Figure S11**

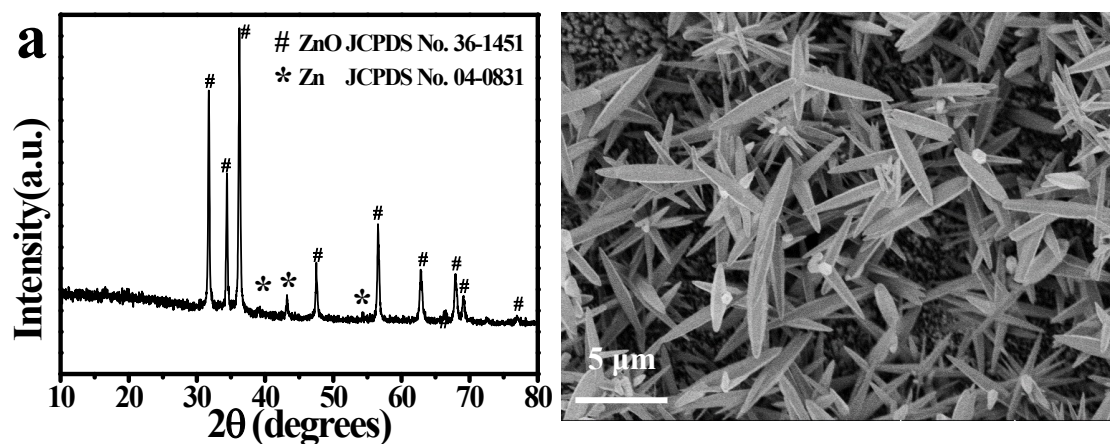

**Fig. S11** (a) XRD pattern and (b) FESEM image of the bare ZnO nanospindle film on Zn substrate.

**Synthesis of bare ZnO nanospindle film on Zn substrate:** NaCl (0.0014 g) was mixed with 20.0 mL of deionized water and transferred into a 50 mL of Teflon-lined autoclave. The cleaned Zn substrate was placed horizontally in the autoclave and hydrothermally treated at 80 °C for 24 h. The milk-white samples were finally obtained.

The XRD pattern (Fig. S11a) can be indexed to the wurtzite ZnO (JCPDS No. 36-1451) and Zn (JCPDS No. 04-0831) from the substrate. The FESEM image (Fig. S11b) shows the ZnO nanospindles with lengths up to 5  $\mu\text{m}$  and diameters around 500 nm.

**Table S1.** The cell phase and parameters of different substance

| Substance | Crystal system | Cell parameters (Å)    |
|-----------|----------------|------------------------|
| ZnO       | Hexagonal      | a=b=3.24982, c=5.20661 |
| Cu        | Cubic          | a=b=c=3.615            |
| Co        | Hexagonal      | a=b=2.5031, c=4.0605   |
| Cd        | Hexagonal      | a=b=2.9793, c=5.6181   |

**Table S2.** The standard electrode potentials ( $\varphi^\theta$ ) of different elements (25 °C)

| Substance             | Half-reaction              | $\varphi^\theta$ (V) |
|-----------------------|----------------------------|----------------------|
| Zn <sup>2+</sup> / Zn | Zn <sup>2+</sup> + 2e = Zn | -0.76                |
| Cu <sup>2+</sup> / Cu | Cu <sup>2+</sup> + 2e = Cu | 0.340                |
| Cd <sup>2+</sup> / Cd | Cd <sup>2+</sup> + 2e = Cd | -0.4025              |
| Co <sup>2+</sup> / Co | Co <sup>2+</sup> + 2e = Co | -0.277               |
| Mg <sup>2+</sup> / Mg | Mg <sup>2+</sup> + 2e = Mg | -2.356               |
